# Supplementary material
Source: Springer Nature journal article supplement (https://www.springermedizin.de/resource/supplementary/12874_2010_540_MOESM10_ESM.pdf/9432428)

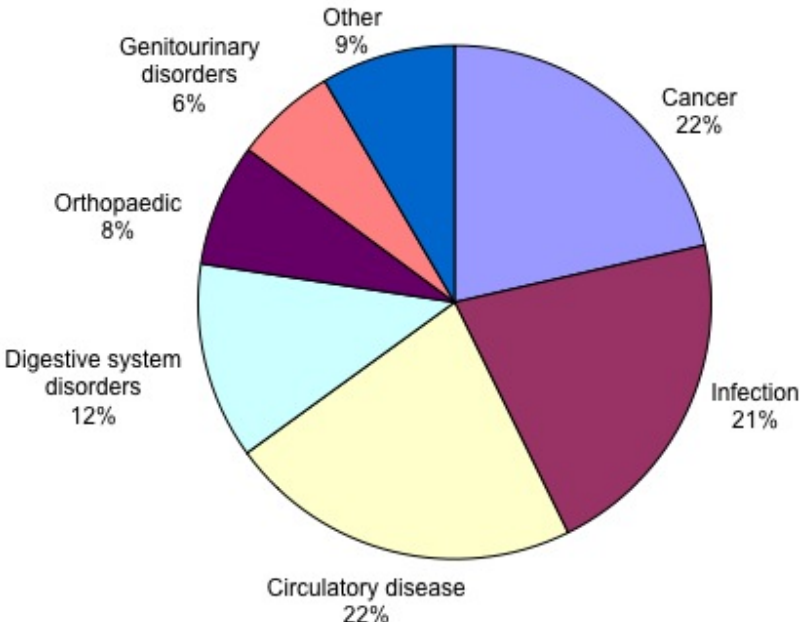

Supplement: MOESM10 [file 9432428]
